# Supplementary material for: Impact of the COVID-19 pandemic on orthopaedic and traumatological care in Prague, the capital of the Czech Republic
Source: PLoS One. 2022 Jun 3;17(6):e0269164. doi: 10.1371/journal.pone.0269164 (PMC9165838; doi:10.1371/journal.pone.0269164)
Supplement: S4 Dataset — (XLSX) [file pone.0269164.s004.xlsx]

## Sheet: Hospitalization-results
S4 Dataset.
		Planned hospitalization	Urgent hospitalization	Polytrauma (except ARO)	Ortho diagnosis	Trauma diagnosis	Oncology diagnosis	Septic diagnosis
Covid-19 - 1st lockdown (12.3.2020-17.5.2020) (67 days)	Period 1a (12.3.2020-2.4.2020) (22 days)	29	73	5	31	58	5	8
	Period 1b (3.4.2020-25.4.2020) (23 days)	10	96	6	14	69	10	13
	Period 1c (26.4.2020-17.5.2020) (22 days)	95	120	8	103	90	6	16
Reference to 1st lockdown (12.3.-17.5.2017-2019)	Period r1a (12.3.-2.4.) (3 years ago - avg)	149.7	154	6.3	179.3	103.7	7.3	18.3
	Period r1b (3.4.-25.4.) (3 years ago - avg)	158	145	4.3	183.7	95	6.3	19.7
	Period r1c (26.4.-17.5.) (3 years ago - avg)	124.7	133.3	7.7	142	97	5	19.7
Covid-19 - 2nd lockdown (7.10.2020-29.10.2020) (47 days)	Period 2a (7.10.2020-29.10.2020) (23 days)	33	78	4	46	59	3	3
	Period 2b (30.10.2020-22.11.2020) (24 days)	9	103	8	24	74	7	7
Reference to 2nd lockdown (7.10.-22.11.2017-2019)	Period r2a (7.10.-29.10.) (3 years ago - avg)	165.3	139.7	6	186.7	87.7	8	22.7
	Period r2b (30.10.-22.11.) (3 years ago - avg)	172.7	149.7	7.7	200.3	83.7	10	28.3
Covid-19 - 3rd lockdown (7.12.2020-11.4.2021) (126 days)	Period 3a (7.12.2020-27.12.2020) (21 days)	48	93	5	68	60	7	12
	Period 3b (28.12.2020-17.1.2021) (21 days)	37	103	6	52	82	7	4
	Period 3c (18.1.2021-7.2.2021) (21 days)	29	110	6	65	75	3	17
	Period 3d (8.2.2021-28.2.2021) (21 days)	32	111	2	56	70	6	17
	Period 3e (1.3.2021-21.3.2021) (21 days)	13	67	3	25	51	3	6
	Period 3f (22.3.2021-11.4.2021) (21 days)	8	89	15	17	76	4	3
Reference to 3rd lockdown (7.12.-11.4.2017-2020)	Period r3a (7.12.-27.12.) (3 years ago - avg)	75.7	120.7	5.7	111.3	85.7	6.3	10.7
	Period r3b (28.12.-17.1.) (3 years ago - avg)	98.7	127.7	5.7	140.3	89.3	9	13.7
	Period r3c (18.1.-7.2.) (3 years ago - avg)	109	134.3	8.3	165	86	7.7	18.7
	Period r3d (8.2.-28.2.) (3 years ago - avg)	126.7	133.3	7	179.7	87.3	6.7	17.3
	Period r3e (1.3.-21.3.) (3 years ago - avg)	129.5	134.5	7	179.5	95.5	6.5	15.5
	Period r3f (22.3.-11.4.) (3 years ago - avg)	125.5	137	6	174.5	92	8	15
		Planned hospitalization	Urgent hospitalization	Polytrauma (except ARO)	Ortho diagnosis	Trauma diagnosis	Oncology diagnosis	Septic diagnosis	Planned hospitalization (%)		Polytrauma (except ARO) (%)	Ortho diagnosis (%)	Trauma diagnosis (%)	Oncology diagnosis (%)	Septic diagnosis (%)
Covid-19 - 1st lockdown (12.3.2020-17.5.2020) (67 days)	Total	134	289	19	148	217	21	37	30.9898	Urgent hospitalization (%)	103.825	29.3069	73.3852	112.903	64.1248
Reference to 1st lockdown (12.3.-17.5.2017-2019)	Total	432.4	432.3	18.3	505	295.7	18.6	57.7	100	66.8517	100	100	100	100	100
Covid-19 - 2nd lockdown (7.10.2020-29.10.2020) (47 days)	Total	42	181	12	70	133	10	10	12.426	100	87.5912	18.0879	77.5963	55.5556	19.6078
Reference to 2nd lockdown (7.10.-22.11.2017-2019)	Total	338	289.4	13.7	387	171.4	18	51	100	62.5432	100	100	100	100	100
Covid-19 - 3rd lockdown (7.12.2020-11.4.2021) (126 days)	Total	167	573	37	283	414	30	59	25.109	100	93.199	29.7801	77.2676	67.8733	64.9065
Reference to 3rd lockdown (7.12.-11.4.2017-2020)	Total	665.1	787.5	39.7	950.3	535.8	44.2	90.9	100	72.7619	100	100	100	100	100
										100
			Planned hospitalization	Urgent hospitalization	Polytrauma (except ARO)	Ortho diagnosis	Trauma diagnosis	Oncology diagnosis	Septic diagnosis
		Period	Decrease to reference period (%)	Decrease to reference period (%)	Decrease to reference period (%)	Decrease to reference period (%)	Decrease to reference period (%)	Decrease to reference period (%)
		Covid-19 - 1st lockdown	69.01	33.15	-0.83	70.69	26.61	-12.9	35.88
		Covid-19 - 2nd lockdown	87.57	37.46	12.41	81.91	22.4	44.44	80.39
		Covid-19 - 3rd lockdown	74.89	27.24	6.8	70.22	22.73	32.13	35.09

## Sheet: 1st Lockdown
1.VLNA	Období
	12.3.2020-17.5.2020	(12.3.2020-2.4.2020)	(3.4.2020-25.4.2020)	(26.4.2020-17.5.2020)	12.3.2019-17.5.2019	(12.3.2019-2.4.2019)	(3.4.2019-25.4.2019)	(26.4.2019-17.5.2019)	12.3.2018-17.5.2018	(12.3.2018-2.4.2018)	(3.4.2018-25.4.2018)	(26.4.2018-17.5.2018)	12.3.2017-17.5.2017	(12.3.2017-2.4.2017)	(3.4.2017-25.4.2017)	(26.4.2017-17.5.2017)
	20-1a-c	20-1a	20-1b	20-1c	19-1a-c	19-1a	19-1b	19-1c	18-1a-c	18-1a	18-1b	18-1c	17-1a-c	17-1a	17-1b	17-1c
Inpatients	439	120	106	213	896	321	302	273	885	288	323	274	831	313	290	228
Planned hospitalization	134	29	10	95	448	168	153	127	452	146	168	138	417	150	158	109
Urgent hospitalization	289	73	96	120	447	153	148	146	436	146	155	135	414	163	132	119
Trauma diagnosis (head,neck)	3	1	1	1	1	0	0	1	1	0	0	1	2	1	0	1
Trauma diagnosis (pelvis, back, chest)	14	4	5	5	15	4	4	7	17	7	4	6	12	6	2	4
Trauma diagnosis upper extremity	91	24	31	36	111	31	31	49	126	43	42	41	113	45	39	29
Trauma diagnosis lower extremity	107	29	32	46	166	63	58	45	142	50	49	43	157	60	53	44
Polytrauma (except ARO)	2	0	0	2	1	1	0	0	3	0	1	2	3	0	2	1
Septic diagnosis	37	8	13	16	56	16	22	18	61	19	20	22	56	20	17	19
Tumour benign	10	3	4	3	15	8	4	3	12	5	7	0	7	4	2	1
Tumour malign	11	2	6	3	7	1	2	4	8	2	2	4	7	2	2	3
Orthopedic diagnosis	111	24	8	79	367	135	122	110	348	113	125	110	333	125	125	83
Orthopedic diagnosis (follow treatment and so on)	23	5	2	16	81	33	31	17	104	33	43	28	84	25	33	26
Orthopedic - complicatin care	14	2	4	8	75	29	27	19	66	20	30	16	57	25	15	17
Polytrauma	19	5	6	8	17	5	4	8	21	7	5	9	17	7	4	6

## Sheet: 2nd Lockdown
2.VLNA
	7.10.2020-22.11.2020	7.10.2020-29.10.2020	30.10.2020-22.11.2020	7.10.2019-22.11.2019	7.10.2019-29.10.2020	30.10.2019-22.11.2019	7.10.2018-22.11.2018	7.10.2018-29.10.2018	30.10.2018-22.11.2018	7.10.2017-22.11.2017	7.10.2017-29.10.2017	30.10.2017-22.11.2017
	20-2a-b	20-2a	20-2b	19-2a-b	19-2a	19-2b	18-2a-b	18-2a	18-2b	17-2a-b	17-2a	17-2b
Inpatients	223	111	112	640	304	336	623	299	324	619	312	307
Planned hospitalization	42	33	9	343	168	175	339	160	179	332	168	164
Urgent hospitalization	181	78	103	297	136	161	284	139	145	287	144	143
Trauma diagnosis (head,neck)	0	0	0	1	0	1	3	1	2	1	0	1
Trauma diagnosis (pelvis, back, chest)	11	4	7	11	5	6	8	3	5	10	4	6
Trauma diagnosis upper extremity	49	23	26	57	23	34	71	40	31	59	33	26
Trauma diagnosis lower extremity	72	32	40	103	52	51	90	47	43	93	50	43
Polytrauma (except ARO)	1	0	1	0	0	0	2	2	0	5	3	2
Septic diagnosis	10	3	7	60	29	31	47	20	27	46	19	27
Tumour benign	5	0	5	7	5	2	4	0	4	11	4	7
Tumour malign	5	3	2	16	7	9	5	2	3	11	6	5
Orthopedic diagnosis	30	26	4	256	130	126	273	127	146	270	134	136
Orthopedic diagnosis (follow treatment and so on)	12	7	5	87	38	49	66	33	33	62	34	28
Orthopedic - complicatin care	28	13	15	42	15	27	54	24	30	51	25	26
Polytrauma	12	4	8	12	5	7	13	6	7	16	7	9

## Sheet: 3rd lockdown
	7.12.2020-11.4.2021	7.12.2020-27.12.2020	28.12.2020-17.1.2021	18.1.2021-7.2.2021	8.2.2021-28.2.2021	1.3.2021-21.3.2021	22.3.2021-11.4.2021	7.12.2019-11.4.2020	7.12.2019-27.12.2019	28.12.2019-17.1.2020	18.1.2020-7.2.2020	8.2.2020-28.2.2020	1.3.2020-21.3.2020	22.3.2020-11.4.2020	7.12.2018-11.4.2019	7.12.2018-27.12.2018	28.12.2018-17.1.2019	18.1.2019-7.2.2019	8.2.2019-28.2.2019	1.3.2019-21.3.2019	22.3.2019-11.4.2019	7.12.2017-11.4.2018	7.12.2017-27.12.2017	28.12.2017-17.1.2018	18.1.2018-7.2.2018	8.2.2018-28.2.2018	1.3.2018-21.3.2018	22.3.2018-11.4.2018
	21-3a-f	21-3a	21-3b	21-3c	21-3d	21-3e	21-3f	20-3a-f	20-3a	20-3b	20-3c	20-3d	20-3e	20-3f	19-3a-f	19-3a	19-3b	19-3c	19-3d	19-3e	19-3f	18-3a-f	18-3a	18-3b	18-3c	18-3d	18-3e	18-3f
Inpatients	740	141	140	139	143	80	97	1172	179	208	243	236	214	92	1501	222	233	244	266	255	281	1464	188	238	243	278	273	244
Planned hospitalization	167	48	37	29	32	13	8	510	70	95	119	117	99	10	661	86	96	102	119	123	135	678	71	105	106	144	136	116
Urgent hospitalization	573	93	103	110	111	67	89	662	109	113	124	119	115	82	840	136	137	142	147	132	146	786	117	133	137	134	137	128
Trauma diagnosis (head,neck)	1	0	1	0	0	0	0	7	2	1	1	1	2	0	6	1	2	0	1	2	0	7	1	2	1	1	1	1
Trauma diagnosis (pelvis, back, chest)	30	3	4	6	2	3	12	21	2	1	5	6	1	6	27	3	3	8	6	2	5	27	4	6	5	2	6	4
Trauma diagnosis upper extremity	125	21	23	24	18	21	18	179	35	32	29	29	31	23	203	31	32	42	33	32	33	202	22	36	37	36	38	33
Trauma diagnosis lower extremity	252	34	53	45	50	27	43	225	38	39	38	35	39	36	332	58	57	40	60	56	61	303	56	55	47	48	52	45
Polytrauma (except ARO)	6	2	1	0	0	0	3	6	2	1	1	2	0	0	8	2	0	3	1	1	1	5	0	1	1	1	1	1
Septic diagnosis	59	12	4	17	17	6	3	74	6	18	20	10	18	2	101	14	16	18	21	15	17	87	12	7	18	21	16	13
Tumour benign	12	4	2	1	2	1	2	17	1	7	1	1	4	3	31	4	7	6	3	6	5	21	3	4	3	3	4	4
Tumour malign	18	3	5	2	4	2	2	32	6	1	8	3	6	8	17	2	5	4	3	0	3	21	3	3	1	7	3	4
Orthopedic diagnosis	149	45	32	27	28	11	6	478	64	94	111	114	93	2	644	84	91	98	116	123	132	657	68	102	105	137	133	112
Orthopedic diagnosis (follow treatment and so on)	64	9	10	23	10	7	5	133	17	26	39	37	12	2	178	23	29	39	27	36	24	205	24	32	37	42	33	37
Orthopedic - complicatin care	70	14	10	15	18	7	6	101	17	13	21	32	14	4	115	21	15	21	19	18	21	113	16	19	24	15	16	23
Polytrauma	37	5	6	6	2	3	15	34	6	3	7	9	3	6	41	6	5	11	8	5	6	39	5	9	7	4	8	6
